# Supplementary material
Source: ML conference proceedings conference paper supplement (https://openaccess.thecvf.com/content/ICCV2021/html/Wang_Low-Rank_Tensor_Completion_ICCV_2021_paper.html)
Supplement: Supplementary file 1 [file Wang_Low-Rank_Tensor_Completion_ICCV_2021_supplemental.zip]

# Appendix

## A Proof of Theorem 3.1

*Proof.* Let  $\mathcal{X} = \mathcal{U} *_{\mathcal{L}} \mathcal{S} *_{\mathcal{L}} \mathcal{V}^T$  be the t-SVD of  $\mathcal{X}$ . By the orthogonality of  $\mathcal{L}$  and the definition of tensor average rank, the problem (20) is equivalent to

$$\mathcal{D}_\lambda(\mathcal{X}) \in \arg \min_{\mathcal{Y}} \frac{1}{2\lambda} \|\mathcal{Y} - \mathcal{X}\|_{\text{F}}^2 + \text{rank}_a(\mathcal{Y}) \quad (\text{A.1})$$

$$\in \arg \min_{\mathcal{Y}} \frac{1}{2\lambda} \|\bar{\mathcal{Y}} - \bar{\mathcal{X}}\|_{\text{F}}^2 + \text{rank}_a(\bar{\mathcal{Y}}) \quad (\text{A.2})$$

$$= \arg \min_{\mathcal{Y}} \sum_{i=1}^{n_3} \left( \frac{1}{2} \|\bar{\mathcal{X}}^{(i)} - \bar{\mathcal{Y}}^{(i)}\|_{\text{F}}^2 + \lambda \text{rank}(\bar{\mathcal{Y}}^{(i)}) \right), \quad (\text{A.3})$$

which is separable to each frontal slice in the transform domain. By the Corollary 2.2 in [1], we get that the  $i$ -th frontal slice of  $\bar{\mathcal{D}}_\lambda(\mathcal{X})$  solves the  $i$ -th subproblem of (A.3). Hence,  $\mathcal{D}_\lambda(\mathcal{X})$  solves problem (20).  $\square$

## B Proof of Proposition 3.1

*Proof.* Let  $\mathcal{X} = \mathcal{U} *_{\mathcal{L}} \mathcal{S} *_{\mathcal{L}} \mathcal{V}^T$  be the t-SVD of  $\mathcal{X}$ . By Theorem 3.1, the right side of (21) equals to

$$\frac{1}{2\lambda} \|\mathcal{D}_\lambda(\mathcal{X}) - \mathcal{X}\|_{\text{F}}^2 + \text{rank}_a(\mathcal{D}_\lambda(\mathcal{X})). \quad (\text{B.1})$$

Substituting the explicit form of  $\mathcal{D}_\lambda(\mathcal{X})$  in (18) into (B.1) and by the orthogonality of  $\mathcal{U}$  and  $\mathcal{V}$ , (B.1) can be simplified as

$$\frac{1}{2\lambda} \sum_{(i,k) \notin \Lambda} \bar{\mathcal{S}}_{iik}^2 + \#\Lambda, \quad (\text{B.2})$$

where  $\Lambda$  is the set defined by

$$\Lambda = \{(i, k) | \bar{\mathcal{S}}_{iik} > \sqrt{2\lambda}\},$$

and  $\#\Lambda$  denotes its cardinality. We can prove (21) by directly verifying the definition of  $\Phi_\lambda(\mathcal{X})$  in (15). Moreover, if  $\lambda \leq \frac{\min_{i,k} \bar{\mathcal{S}}_{iik}^2}{2}$ , we get that  $\mathcal{D}_\lambda(\mathcal{X}) = \mathcal{X}$ . Hence,  $\Phi_\lambda(\mathcal{X}) = \text{rank}_a(\mathcal{X})$ .  $\square$

The following notation is needed for presenting the convergence analysis. For a tensor  $\mathcal{X} \in \mathbb{R}^{n_1 \times n_2 \times n_3}$ , let  $\sigma(\bar{\mathcal{X}}^{(i)})$  denote the singular value vector of the  $i$ -th frontal slice of  $\bar{\mathcal{X}} = L(\mathcal{X})$ . We denote by  $\sigma_j(\bar{\mathcal{X}}^{(i)})$  the  $j$ -th component of  $\sigma(\bar{\mathcal{X}}^{(i)})$  with  $1 \leq j \leq \min(n_1, n_2)$ .

**Lemma B.1.** *Let  $\{\mathcal{Y}_k\}$  be generated by (23), then*

- (1) *Either  $\sigma_j(\bar{\mathcal{Y}}_k^{(i)}) \geq \sqrt{2\lambda\mu}$  or  $\sigma_j(\bar{\mathcal{Y}}_k^{(i)}) = 0$ , for all  $1 \leq i \leq n_3, 1 \leq j \leq \min(n_1, n_2)$ ,*
- (2)  *$\|\mathcal{Y}_{k+1} - \mathcal{Y}_k\|_{\text{F}} \geq \sqrt{2\lambda\mu}$ , if  $\text{rank}_a(\mathcal{Y}_{k+1}) \neq \text{rank}_a(\mathcal{Y}_k)$ .*

*Proof.* Item (1) follows immediately from the closed-form solution of  $\{\mathcal{Y}_k\}$  in (23). Suppose that  $\text{rank}_a(\mathcal{Y}_{k+1}) \neq \text{rank}_a(\mathcal{Y}_k)$  for some  $k$ , by Item (1), there exist at least one  $i$  and one  $j$  such that either  $\sigma_j(\bar{\mathcal{Y}}_{k+1}^{(i)}) \geq \sqrt{2\lambda\mu}$ ,  $\sigma_j(\bar{\mathcal{Y}}_k^{(i)}) = 0$  or  $\sigma_j(\bar{\mathcal{Y}}_{k+1}^{(i)}) = 0$ ,  $\sigma_j(\bar{\mathcal{Y}}_k^{(i)}) \geq \sqrt{2\lambda\mu}$ . For both cases, we have that

$$\|\sigma(\bar{\mathcal{Y}}_{k+1}^{(i)}) - \sigma(\bar{\mathcal{Y}}_k^{(i)})\|_2 \geq \sqrt{2\lambda\mu}.$$

Moreover, for any  $1 \leq i \leq n_3$ , we know from Corollary 7.1.4.3 of [2] that

$$\|\bar{\mathcal{Y}}_{k+1}^{(i)} - \bar{\mathcal{Y}}_k^{(i)}\|_F \geq \|\sigma(\bar{\mathcal{Y}}_{k+1}^{(i)}) - \sigma(\bar{\mathcal{Y}}_k^{(i)})\|_2.$$

The above two inequalities and the orthogonality of  $\mathbf{L}$  yield Item (2).  $\square$

## C Proof of Theorem 3.2

*Proof.* Denote

$$E(\mathcal{Y}, \mathcal{X}) = \frac{1}{2\lambda} \|\mathcal{Y} - \mathcal{X}\|_F^2 + \text{rank}_a(\mathcal{Y}).$$

By the second subproblem in (23), we conclude that

$$\|\mathcal{Y}_{k+1} - \mathcal{X}_{k+1}\|_F^2 \leq \|\mathcal{Y}_{k+1} - \mathcal{X}_k\|_F^2.$$

Then we have that

$$\begin{aligned} \lambda E(\mathcal{Y}_{k+1}, \mathcal{X}_{k+1}) &= \frac{1}{2} \|\mathcal{Y}_{k+1} - \mathcal{X}_{k+1}\|_F^2 + \lambda \text{rank}_a(\mathcal{Y}_{k+1}) \\ &\leq \frac{1}{2} \|\mathcal{Y}_{k+1} - \mathcal{X}_k\|_F^2 + \lambda \text{rank}_a(\mathcal{Y}_{k+1}). \end{aligned} \quad (\text{C.1})$$

Expanding the term  $\|\mathcal{Y}_{k+1} - \mathcal{X}_k\|_F^2$  yields

$$\lambda E(\mathcal{Y}_{k+1}, \mathcal{X}_{k+1}) \leq \frac{1}{2} \|\mathcal{Y}_{k+1} - \mathcal{Y}_k\|_F^2 + \frac{1}{2} \|\mathcal{Y}_k - \mathcal{X}_k\|_F^2 + \langle \mathcal{Y}_{k+1} - \mathcal{Y}_k, \mathcal{Y}_k - \mathcal{X}_k \rangle + \lambda \text{rank}_a(\mathcal{Y}_{k+1}). \quad (\text{C.2})$$

Hence, for any  $\mu \in (0, 1)$ , we obtain that

$$\lambda E(\mathcal{Y}_{k+1}, \mathcal{X}_{k+1}) \leq \frac{1}{2\mu} \|\mathcal{Y}_{k+1} - \mathcal{Y}_k\|_F^2 + \frac{1}{2} \|\mathcal{Y}_k - \mathcal{X}_k\|_F^2 + \langle \mathcal{Y}_{k+1} - \mathcal{Y}_k, \mathcal{Y}_k - \mathcal{X}_k \rangle + \lambda \text{rank}_a(\mathcal{Y}_{k+1}). \quad (\text{C.3})$$

The first line in (23) can be rewritten as

$$\mathcal{Y}_{k+1} \in \arg \min_{\mathcal{Y}} \left\{ \frac{1}{2\mu} \|\mathcal{Y} - \mathcal{Y}_k\|_F^2 + \mu \|\mathcal{Y}_k - \mathcal{X}_k\|_F^2 + \lambda \text{rank}_a(\mathcal{Y}) \right\}. \quad (\text{C.4})$$

Expanding the quadratic term in (C.4) and replacing  $\frac{\mu}{2} \|\mathcal{Y}_k - \mathcal{X}_k\|_F^2$  as  $\frac{1}{2} \|\mathcal{Y}_k - \mathcal{X}_k\|_F^2$  (will not alter the minimizer) yield that

$$\mathcal{Y}_{k+1} \in \arg \min_{\mathcal{Y}} \left\{ \frac{1}{2\mu} \|\mathcal{Y} - \mathcal{Y}_k\|_F^2 + \frac{1}{2} \|\mathcal{Y}_k - \mathcal{X}_k\|_F^2 + \langle \mathcal{Y} - \mathcal{Y}_k, \mathcal{Y}_k - \mathcal{X}_k \rangle + \lambda \text{rank}_a(\mathcal{Y}) \right\}. \quad (\text{C.5})$$

Substituting  $\mathcal{Y}_{k+1}$  and  $\mathcal{Y}_k$  into the objective function of (C.5), and by (C.3), we conclude that

$$E(\mathcal{Y}_{k+1}, \mathcal{X}_{k+1}) \leq E(\mathcal{Y}_k, \mathcal{X}_k). \quad (\text{C.6})$$

Therefore, the sequence  $\{E(\mathcal{Y}_k, \mathcal{X}_k)\}$  is monotonically decreasing and hence converges. Moreover, by (C.2), (C.3) and (C.6), we get that

$$\|\mathcal{Y}_{k+1} - \mathcal{Y}_k\|_F^2 \leq \frac{2\mu\lambda}{1-\mu} (E(\mathcal{Y}_k, \mathcal{X}_k) - E(\mathcal{Y}_{k+1}, \mathcal{X}_{k+1})). \quad (\text{C.7})$$

This implies that  $\lim_{k \rightarrow \infty} \|\mathbf{y}_{k+1} - \mathbf{y}_k\|_F = 0$ . By the second subproblem of (23),  $\mathbf{x}_{k+1}$  is essentially the projection of  $\mathbf{y}_{k+1}$  on the feasible set

$$\mathcal{C} = \{\mathbf{x} \mid P_{\Omega}(\mathbf{x}) = P_{\Omega}(\mathbf{M})\}.$$

The nonexpansiveness of the projection operator implies  $\lim_{k \rightarrow \infty} \|\mathbf{x}_{k+1} - \mathbf{x}_k\|_F = 0$ .

The result of  $\lim_{k \rightarrow \infty} \|\mathbf{y}_{k+1} - \mathbf{y}_k\|_F = 0$  implies that there exists a number  $K > 0$  such that  $\|\mathbf{y}_{k+1} - \mathbf{y}_k\|_F < \sqrt{2\lambda\mu}$  for all  $k > K$ . By Item (2) of Lemma B.1, the  $\text{rank}_a(\mathbf{y}_k)$  keeps invariant for all  $k > K$ .  $\square$

### C.1 Note

If we choose  $(\mathbf{y}_0, \mathbf{x}_0)$  be a feasible point of (22) and bounded, by (C.7) we have that

$$\sum_{k=1}^{+\infty} \|\mathbf{y}_{k+1} - \mathbf{y}_k\|_F^2 < +\infty,$$

which implies that  $\lim_{k \rightarrow \infty} \|\mathbf{y}_{k+1} - \mathbf{y}_k\|_F = 0$  and the sequence  $\{\mathbf{y}_k\}$  is bounded. Moreover, the sequence  $\{\mathbf{x}_k\}$  is also bounded.

## D Image Recovery

We show the detailed PSNR values of the standard images with different sampling rates in this appendix.

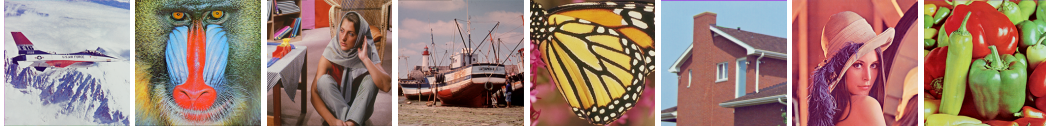

Figure 1: Standard images: airplane, baboon, barbara, boats, butterfly, house, lena, peppers (from left to right).

Table 1: Comparison of PSNR on the standard images at sampling rate  $p = 0.2$ .

| Method  | airplane     | baboon       | barbara      | boats        | butterfly    | house        | lena         | peppers      | average      |
|---------|--------------|--------------|--------------|--------------|--------------|--------------|--------------|--------------|--------------|
| HaLRTC  | 21.27        | 19.12        | 21.02        | 21.06        | 16.94        | 24.29        | 21.76        | 20.51        | 20.75        |
| T-SVD   | 21.51        | 18.58        | 20.90        | 21.66        | 17.27        | 24.43        | 21.64        | 19.47        | 20.68        |
| TNN     | 23.21        | 19.68        | 21.53        | 22.90        | 19.69        | 25.70        | 22.42        | 21.03        | 22.02        |
| TNN-DCT | 23.23        | 19.84        | 21.58        | 23.00        | 19.76        | 26.24        | 22.54        | 21.19        | 22.17        |
| Ours    | <b>23.99</b> | <b>20.13</b> | <b>22.33</b> | <b>23.72</b> | <b>20.95</b> | <b>27.36</b> | <b>23.51</b> | <b>22.06</b> | <b>23.01</b> |

Table 2: Comparison of PSNR on the standard images at sampling rate  $p = 0.4$ .

| Method  | airplane     | baboon       | barbara      | boats        | butterfly    | house        | lena         | peppers      | average      |
|---------|--------------|--------------|--------------|--------------|--------------|--------------|--------------|--------------|--------------|
| HaLRTC  | 25.64        | 21.91        | 25.30        | 25.24        | 22.15        | 26.69        | 26.11        | 25.26        | 24.78        |
| T-SVD   | 26.04        | 21.84        | 25.65        | 26.71        | 23.27        | 30.04        | 26.34        | 24.62        | 25.56        |
| TNN     | 27.61        | 23.22        | 26.00        | 27.46        | 25.68        | 30.72        | 27.28        | 25.25        | 26.65        |
| TNN-DCT | 27.70        | 23.27        | 26.06        | 27.57        | 25.90        | 31.30        | 27.43        | 25.45        | 26.83        |
| Ours    | <b>28.89</b> | <b>23.82</b> | <b>27.20</b> | <b>28.95</b> | <b>28.28</b> | <b>32.68</b> | <b>29.08</b> | <b>26.72</b> | <b>28.20</b> |

Table 3: Comparison of PSNR on the standard images at sampling rate  $p = 0.6$ .

| Method  | airplane     | baboon       | barbara      | boats        | butterfly    | house        | lena         | peppers      | average      |
|---------|--------------|--------------|--------------|--------------|--------------|--------------|--------------|--------------|--------------|
| HaLRTC  | 30.05        | 25.03        | 29.40        | 29.75        | 27.50        | 34.23        | 30.36        | 29.85        | 29.52        |
| T-SVD   | 30.90        | 25.39        | 30.40        | 32.00        | 30.45        | 34.59        | 30.95        | 29.15        | 30.48        |
| TNN     | 31.88        | 26.94        | 30.33        | 32.43        | 32.16        | 34.81        | 31.88        | 29.41        | 31.23        |
| TNN-DCT | 31.94        | 26.93        | 30.42        | 32.61        | 32.72        | 35.47        | 32.07        | 29.66        | 31.48        |
| Ours    | <b>32.72</b> | <b>27.87</b> | <b>31.83</b> | <b>34.84</b> | <b>35.91</b> | <b>36.71</b> | <b>34.17</b> | <b>31.01</b> | <b>33.13</b> |

Table 4: Comparison of PSNR on the standard images at sampling rate  $p = 0.8$ .

| Method  | airplane     | baboon       | barbara      | boats        | butterfly    | house        | lena         | peppers      | average      |
|---------|--------------|--------------|--------------|--------------|--------------|--------------|--------------|--------------|--------------|
| HaLRTC  | 36.06        | 29.61        | 34.70        | 35.95        | 34.65        | 39.21        | 36.00        | 35.43        | 35.20        |
| T-SVD   | 37.12        | 30.41        | 36.25        | 38.69        | 40.40        | 39.75        | 37.00        | 34.99        | 36.83        |
| TNN     | 36.77        | 32.06        | 36.09        | 38.77        | 39.95        | 39.72        | 37.69        | 34.37        | 36.92        |
| TNN-DCT | 36.76        | 31.97        | 36.15        | 39.01        | 41.16        | 40.32        | 37.87        | 34.67        | 37.24        |
| Ours    | <b>37.21</b> | <b>33.30</b> | <b>38.51</b> | <b>41.50</b> | <b>44.33</b> | <b>41.24</b> | <b>40.23</b> | <b>36.38</b> | <b>39.09</b> |

## References

- [1] Y. Zhang and Z. Lu. Penalty decomposition methods for rank minimization. In *Advances in Neural Information Processing Systems*, pages 46–54. 2011.
- [2] R. A. Horn and C. R. Johnson. *Matrix Analysis*. Cambridge University Press, 2012.
