# Supplementary material
Source: ML conference proceedings conference paper supplement (https://openaccess.thecvf.com/content/ICCV2021/html/Wang_Low-Rank_Tensor_Completion_ICCV_2021_paper.html)
Supplement: Supplementary file 2 [file Wang_Low-Rank_Tensor_Completion_ICCV_2021_supplemental.zip]

Archive with 2 entries (2 files):
- 08614-supp/Appendix.pdf
- 08614-supp/Matlab codes.zip
